# Supplementary material for: Atypical Response in Metastatic Non-Small Cell Lung Cancer Treated with PD-1/PD-L1 Inhibitors: Radiographic Patterns and Clinical Value of Local Therapy
Source: MDPI journal article supplement (doi:10.3390/cancers15010180), 2022-12-28
Supplement: s1 [file s1]

Table S1. Cox analyses for progression-free survival in the whole population

|                                                            | Univariate analysis |        |       |         | Multivariate analysis |        |       |         |
|------------------------------------------------------------|---------------------|--------|-------|---------|-----------------------|--------|-------|---------|
|                                                            | HR                  | 95% CI |       | P value | HR                    | 95% CI |       | P value |
| Age ( $\leq 62$ y vs $> 62$ y)                             | 1.008               | 0.977  | 1.039 | 0.619   |                       |        |       |         |
| Gender (Male vs Female)                                    | 2.303               | 1.320  | 4.018 | 0.003   | 2.049                 | 1.039  | 4.039 | 0.038   |
| ECOG PS score (0-1 vs 2)                                   | 1.664               | 0.514  | 5.389 | 0.396   |                       |        |       |         |
| Smoking status<br>(Never vs Ever)                          | 0.609               | 0.366  | 1.014 | 0.057   | 0.834                 | 0.448  | 1.555 | 0.569   |
| Histology<br>(Squamous vs Non-squamous)                    | 0.927               | 0.510  | 1.685 | 0.804   |                       |        |       |         |
| NO. of metastatic organs<br>( $> 3$ vs $\leq 3$ )          | 0.943               | 0.490  | 1.813 | 0.860   |                       |        |       |         |
| NO. of metastatic sites<br>( $> 3$ vs $\leq 3$ )           | 1.283               | 0.776  | 2.123 | 0.332   |                       |        |       |         |
| Treatment regimens<br>(ICI alone vs ICI combination)       | 1.289               | 0.769  | 2.162 | 0.336   |                       |        |       |         |
| Treatment lines (1 <sup>st</sup> vs $\geq 2^{\text{nd}}$ ) | 1.001               | 0.596  | 1.681 | 0.996   |                       |        |       |         |
| PD-L1 expression, %                                        |                     |        |       | 0.582   |                       |        |       |         |
| 1-49 vs $< 1$                                              | 1.275               | 0.370  | 4.396 | 0.701   |                       |        |       |         |
| $\geq 50$ vs $< 1$                                         | 0.662               | 0.211  | 2.085 | 0.481   |                       |        |       |         |
| Unknown vs $< 1$                                           | 0.939               | 0.335  | 2.634 | 0.906   |                       |        |       |         |
| Response pattern<br>(TR vs AR)                             | 0.823               | 0.498  | 1.361 | 0.448   |                       |        |       |         |

Abbreviations: ECOG PS, Eastern Cooperative Oncology Group Performance Status. TR, typical response; AR, atypical response.

Table S2. Cox analyses for overall survival in the whole population

|                                                             | Univariate analysis |        |         |       |
|-------------------------------------------------------------|---------------------|--------|---------|-------|
|                                                             | HR                  | 95% CI | P value |       |
| Age ( $\leq 62$ y vs $> 62$ y)                              | 0.992               | 0.950  | 1.037   | 0.734 |
| Gender (Male vs Female)                                     | 1.048               | 0.426  | 2.581   | 0.918 |
| ECOG PS score (0-1 vs 2)                                    | 0.046               | 0.000  | 91.526  | 0.426 |
| Smoking status (Never vs Ever)                              | 0.693               | 0.329  | 1.462   | 0.336 |
| Histology (squamous vs non-squamous)                        | 0.955               | 0.388  | 2.348   | 0.920 |
| NO. of metastatic organs ( $> 3$ vs $\leq 3$ )              | 0.935               | 0.374  | 2.336   | 0.885 |
| NO. of metastatic sites ( $> 3$ vs $\leq 3$ )               | 2.050               | 0.951  | 4.417   | 0.067 |
| Treatment regimens<br>(ICI alone vs ICI combination)        | 1.809               | 0.851  | 3.846   | 0.123 |
| Treatment lines ( $1^{\text{st}}$ vs $\geq 2^{\text{nd}}$ ) | 1.064               | 0.492  | 2.301   | 0.874 |
| PD-L1 expression, %                                         |                     |        |         | 0.515 |
| 1-49 vs $< 1$                                               | 0.732               | 0.147  | 3.635   | 0.703 |
| $\geq 50$ vs $< 1$                                          | 0.356               | 0.083  | 1.528   | 0.165 |
| Unknown vs $< 1$                                            | 0.495               | 0.145  | 1.697   | 0.263 |
| Response pattern (TR vs AR)                                 | 0.702               | 0.329  | 1.496   | 0.359 |

Abbreviations: ECOG PS, Eastern Cooperative Oncology Group Performance Status. TR, typical response; AR, atypical response.

Table S3. Characteristics of patients in propensity-score matched cohort

|                             | Atypical Response (N=55) | Typical Response (N=55) | P value |
|-----------------------------|--------------------------|-------------------------|---------|
| Age (years)                 |                          |                         | 1.000   |
| Mean (SD)                   | 60.6 (8.97)              | 61.5 (8.64)             |         |
| Gender                      |                          |                         | 0.818   |
| Male                        | 44 (80.0%)               | 42 (76.4%)              |         |
| Female                      | 11 (20.0%)               | 13 (23.6%)              |         |
| ECOG PS score               |                          |                         | 1.000   |
| 0-1                         | 52 (94.5%)               | 51 (92.7%)              |         |
| 2                           | 3 (5.5%)                 | 4 (7.3%)                |         |
| Smoking status              |                          |                         | 0.849   |
| Ever                        | 27 (49.1%)               | 29 (52.7%)              |         |
| Never                       | 28 (50.9%)               | 26 (47.3%)              |         |
| Histology                   |                          |                         | 0.823   |
| Squamous-cell Carcinoma     | 12 (21.8%)               | 14 (25.5%)              |         |
| Non-Squamous-cell Carcinoma | 43 (78.2%)               | 41 (74.5%)              |         |
| NO. of metastatic organs    |                          |                         | 0.812   |
| ≤3                          | 43 (78.2%)               | 45 (81.8%)              |         |
| >3                          | 12 (21.8%)               | 10 (18.2%)              |         |
| NO. of metastatic sites     |                          |                         | 1.000   |
| ≤3                          | 28 (50.9%)               | 29 (52.7%)              |         |
| >3                          | 27 (49.1%)               | 26 (47.3%)              |         |
| Treatment regimens          |                          |                         | 0.694   |
| ICI alone                   | 19 (34.5%)               | 22 (40.0%)              |         |
| ICI combination             | 36 (65.5%)               | 33 (60.0%)              |         |
| Treatment lines             |                          |                         | 0.702   |
| 1st                         | 24 (43.6%)               | 27 (49.1%)              |         |
| ≥2 <sup>nd</sup>            | 31 (56.4%)               | 28 (50.9%)              |         |
| PD-L1 expression, %         |                          |                         | 0.854   |

|         |            |            |
|---------|------------|------------|
| <1      | 2 (3.6%)   | 4 (7.3%)   |
| 1-49    | 7 (12.7%)  | 6 (10.9%)  |
| ≥50     | 14 (25.5%) | 13 (23.6%) |
| unknown | 32 (58.2%) | 32 (58.2%) |

---

Abbreviations: ICI, immune checkpoint inhibitors; ECOG PS, Eastern Cooperative Oncology Group Performance Status; SD, standard deviation.

Table S4. Tumor response and survival analysis in the whole population

| Response/Survival                    | Atypical response (N=56) | Typical response (N=271) | All patients (N=327) |
|--------------------------------------|--------------------------|--------------------------|----------------------|
| BOR, No. (%)                         |                          |                          |                      |
| Confirmed CRs                        | 0(0.0)                   | 1(0.4)                   | 1(0.3)               |
| Confirmed PRs                        | 30(53.6)                 | 201(74.2)                | 231(70.6)            |
| SD                                   | 26(46.4)                 | 69(25.5)                 | 95(29.1)             |
| PFS, median (95% CI), months         | 12(9-20)                 | 10(9-12)                 | 11(9-12)             |
| <sup>1</sup> PFS at 6 months, n (%)  | 46(86.8)                 | 195(72.5)                | 241(75.0)            |
| <sup>1</sup> PFS at 12 months, n (%) | 23(48.1)                 | 82(42.2)                 | 105(43.2)            |
| <sup>1</sup> PFS at 18 months, n (%) | 8(32.3)                  | 31(29.2)                 | 39(29.8)             |
| OS, median (95% CI), months          | 28(24-NR)                | -                        | -                    |
| <sup>2</sup> OS at 6 months, n (%)   | 51(98.0)                 | 250(98.8)                | 301(98.7)            |
| <sup>2</sup> OS at 12 months, n (%)  | 34(83.8)                 | 167(87.3)                | 201(86.7)            |
| <sup>2</sup> OS at 18 months, n (%)  | 19(76.8)                 | 93(71.7)                 | 112(73.5)            |

Abbreviations: BOR, best overall response; CRs, complete responses; PRs, partial responses; SD, stable disease; PFS, progression-free survival; OS, overall survival; CI, confidence interval; NR, not reached.

<sup>1</sup>PFS rate was defined as the probability of a patient remaining progression free and alive up to 6, 12, 18 months, respectively.

<sup>2</sup>OS rate was defined as the probability of a patient remaining alive up to 6, 12, 18 months, respectively.

Table S5. Survival analysis in propensity score matched cohorts

|                                      | Atypical response<br>(N=55) | Typical response<br>(N=55) | All patients<br>(N=110) |
|--------------------------------------|-----------------------------|----------------------------|-------------------------|
| PFS, median (95% CI), months         | 12(9-NR)                    | 10(8-17)                   | 12(9-16)                |
| <sup>1</sup> PFS at 6 months, n (%)  | 46(88.6)                    | 41(71.6)                   | 87(80.3)                |
| <sup>1</sup> PFS at 12 months, n (%) | 23(49.6)                    | 18(42.0)                   | 41(45.9)                |
| <sup>1</sup> PFS at 18 months, n (%) | 9(33.0)                     | 9(30.8)                    | 18(32.1)                |
| OS, median (95% CI), months          | 34(19-NR)                   | 28(24-NR)                  | 34(22-NR)               |
| <sup>2</sup> OS at 6 months, n (%)   | 50(98.0)                    | 49(98.0)                   | 99(98.0)                |
| <sup>2</sup> OS at 12 months, n (%)  | 33(83.4)                    | 37(88.5)                   | 70(87.2)                |
| <sup>2</sup> OS at 18 months, n (%)  | 19(76.4)                    | 21(70.0)                   | 40(75.6)                |

Abbreviations: PFS, progression-free survival; OS, overall survival; CI, confidence interval; NR, not reached.

<sup>1</sup>PFS rate was defined as the probability of a patient remaining progression free and alive up to 6, 12, 18 months, respectively.

<sup>2</sup>OS rate was defined as the probability of a patient remaining alive up to 6, 12, 18 months, respectively.

Table S6. Characteristics of patients with atypical response receiving local therapy or not

|                             | With local therapy<br>(N=16) | Without local therapy<br>(N=40) | P value |
|-----------------------------|------------------------------|---------------------------------|---------|
| Age [mean (range)] years    | 59.5 (9.83)                  | 62.3 (8.01)                     | 0.326   |
| Gender                      |                              |                                 | 0.632*  |
| Male                        | 14 (87.5%)                   | 31 (77.5%)                      |         |
| Female                      | 2 (12.5%)                    | 9 (22.5%)                       |         |
| ECOG PS score               |                              |                                 | 0.570*  |
| 0-1                         | 14(87.5%)                    | 38(95.0%)                       |         |
| 2                           | 2(12.5%)                     | 2(5.0%)                         |         |
| Smoking status              |                              |                                 | 0.966   |
| Ever                        | 8 (50.0%)                    | 18 (45.0%)                      |         |
| Never                       | 8 (50.0%)                    | 22 (55.0%)                      |         |
| Histology                   |                              |                                 | 0.733   |
| Squamous-cell Carcinoma     | 5 (31.3%)                    | 9 (22.5%)                       |         |
| Non-Squamous-cell Carcinoma | 11 (68.8%)                   | 31 (77.5%)                      |         |
| NO. of metastatic organs    |                              |                                 | 0.312   |
| $\leq 3$                    | 11 (68.8%)                   | 34 (85.0%)                      |         |
| $> 3$                       | 5 (31.3%)                    | 6 (15.0%)                       |         |
| NO. of metastatic sites     |                              |                                 | 1.00    |
| $\leq 3$                    | 8 (50.0%)                    | 21 (52.5%)                      |         |
| $> 3$                       | 8 (50.0%)                    | 19 (47.5%)                      |         |
| Treatment regimens          |                              |                                 | 1.000   |
| ICI alone                   | 7 (43.8%)                    | 16 (40.0%)                      |         |
| ICI combination             | 9 (56.3%)                    | 24 (60.0%)                      |         |
| Treatment lines             |                              |                                 | 0.642   |
| 1st                         | 9 (56.3%)                    | 18 (45.0%)                      |         |
| $\geq 2^{\text{nd}}$        | 7 (43.8%)                    | 22 (55.0%)                      |         |
| PD-L1 expression, %         |                              |                                 | 0.390*  |

|         |           |            |
|---------|-----------|------------|
| <1      | 0 (0%)    | 4 (10.0%)  |
| 1-49    | 3 (18.8%) | 3 (7.5%)   |
| ≥50     | 4 (25.0%) | 9 (22.5%)  |
| Unknown | 9 (56.3%) | 24 (60.0%) |

---

Abbreviations: \* Fisher's exact method. ICI, immune checkpoint inhibitors; ECOG PS, Eastern Cooperative Oncology Group Performance Status.



Table S7. Cox analyses for progression-free survival in patients with atypical response

|                                                             | Univariate analysis |        |        |         | Multivariate analysis |        |        |         |
|-------------------------------------------------------------|---------------------|--------|--------|---------|-----------------------|--------|--------|---------|
|                                                             | HR                  | 95% CI |        | P value | HR                    | 95% CI |        | P value |
| Age ( $\leq 62$ y vs $> 62$ y)                              | 1.211               | 0.583  | 2.516  | 0.607   |                       |        |        |         |
| Gender (Male vs Female)                                     | 1.667               | 0.743  | 3.738  | 0.215   |                       |        |        |         |
| ECOG PS score (2 vs 0-1)                                    | 7.924               | 2.138  | 29.369 | 0.002   | 6.014                 | 1.613  | 22.425 | 0.008   |
| Smoking status<br>(Never vs Ever)                           | 1.023               | 0.503  | 2.080  | 0.949   |                       |        |        |         |
| Histology<br>(Squamous vs Non-squamous)                     | 0.699               | 0.320  | 1.524  | 0.368   |                       |        |        |         |
| NO. of metastatic organs<br>( $> 3$ vs $\leq 3$ )           | 0.859               | 0.423  | 1.744  | 0.674   |                       |        |        |         |
| NO. of metastatic sites<br>( $> 3$ vs $\leq 3$ )            | 0.854               | 0.326  | 2.236  | 0.748   |                       |        |        |         |
| Treatment regimens<br>(ICI alone vs ICI combination)        | 1.417               | 0.688  | 2.919  | 0.344   |                       |        |        |         |
| Treatment lines ( $1^{\text{st}}$ vs $\geq 2^{\text{nd}}$ ) | 0.770               | 0.372  | 1.594  | 0.481   |                       |        |        |         |
| PD-L1 expression, %                                         |                     |        |        | 0.756   |                       |        |        |         |
| 1-49 vs $< 1$                                               | 0.703               | 0.140  | 3.545  | 0.670   |                       |        |        |         |
| $\geq 50$ vs $< 1$                                          | 0.454               | 0.106  | 1.935  | 0.286   |                       |        |        |         |
| Unknown vs $< 1$                                            | 0.628               | 0.185  | 2.139  | 0.457   |                       |        |        |         |
| Local therapy<br>(No vs Yes)                                | 4.322               | 1.313  | 14.229 | 0.016   | 3.947                 | 1.190  | 13.086 | 0.025   |

Abbreviations: ECOG PS, Eastern Cooperative Oncology Group Performance Status.
