# Supplementary figures and images for: Atypical Response in Metastatic Non-Small Cell Lung Cancer Treated with PD-1/PD-L1 Inhibitors: Radiographic Patterns and Clinical Value of Local Therapy
Source: MDPI journal article supplement (doi:10.3390/cancers15010180), 2022-12-28

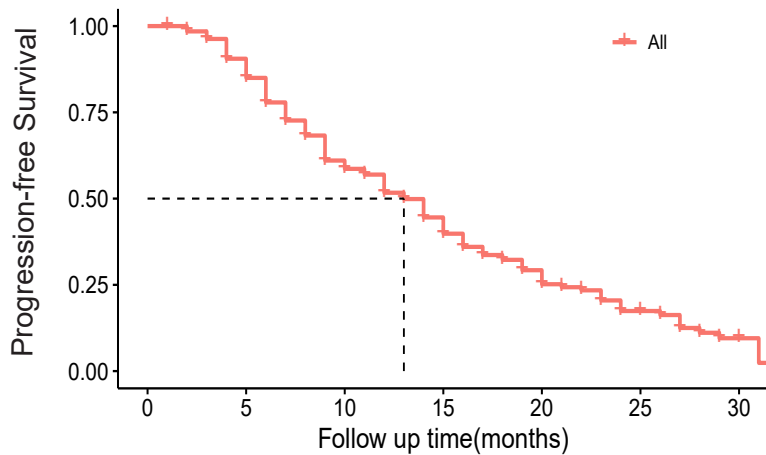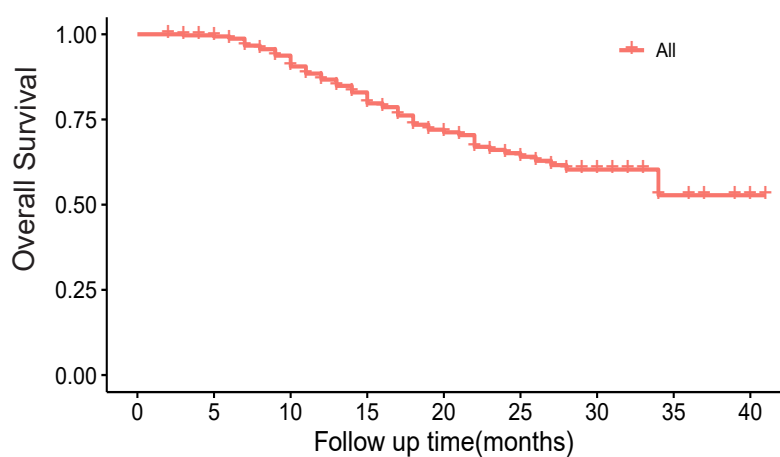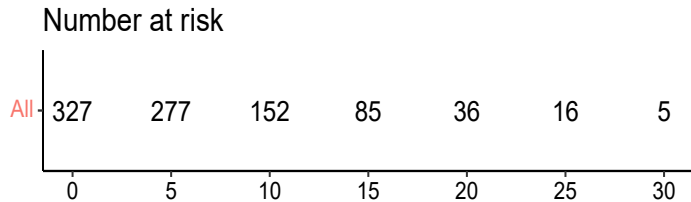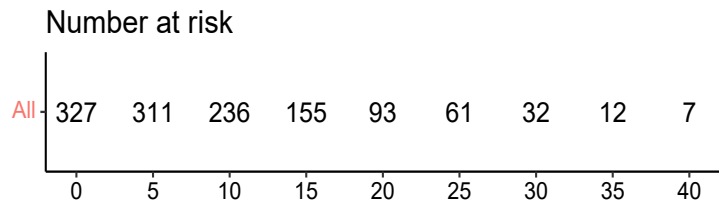

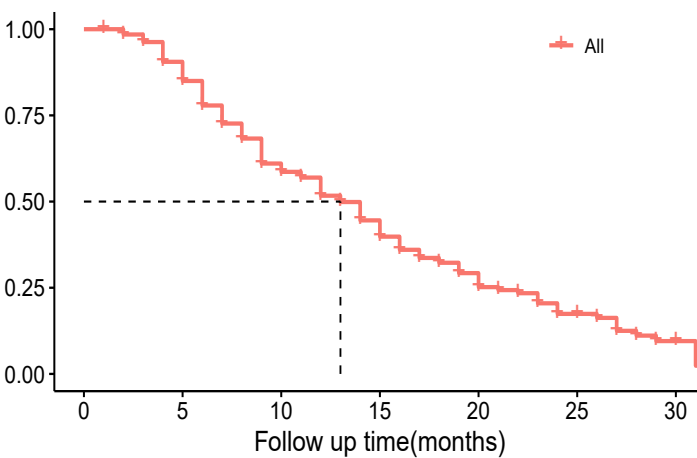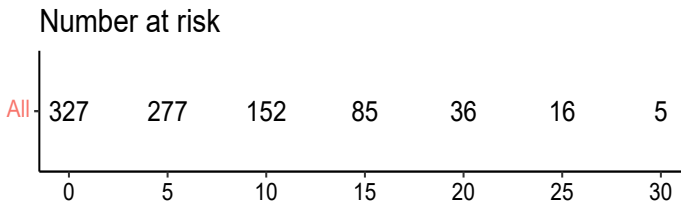

Supplement: s1 [file s1]
